# Supplementary material for: Treat-and-Extend vs. Pro Re Nata Regimen of Ranibizumab for Diabetic Macular Edema—A Two-Year Matched Comparative Study
Source: PubMed Central journal article supplement (PMC8821911; doi:10.3389/fmed.2021.781421), 2022-01-25
Supplement: Table_1.pdf [file Table_1.pdf]

Supplementary Table 1. Two different treatment regimens for anti-vascular endothelial growth factor therapy in patients with diabetic macular edema.

| <b>PRN regimen (BCVA and OCT examined at every clinic visit)</b>                                                                                                                                                                   |                                                                                                                                                                                                                                                                                                |
|------------------------------------------------------------------------------------------------------------------------------------------------------------------------------------------------------------------------------------|------------------------------------------------------------------------------------------------------------------------------------------------------------------------------------------------------------------------------------------------------------------------------------------------|
| <b>Injection</b>                                                                                                                                                                                                                   | <b>Follow-up only</b>                                                                                                                                                                                                                                                                          |
| <ul style="list-style-type: none"> <li>● BCVA loss <math>\geq</math> 5 ETDRS letters</li> <li>OR</li> <li>● New or increased SRF and/or IRC</li> <li>OR</li> <li>● CFT increase <math>\geq</math> 100 <math>\mu</math>m</li> </ul> | <ul style="list-style-type: none"> <li>● BCVA loss <math>&lt;</math> 5 ETDRS letters</li> <li>AND</li> <li>● No SRF and IRC, or stable IRC over 2 consecutive treatment visits after the loading phase</li> <li>AND</li> <li>● CFT increase <math>&lt;</math> 100 <math>\mu</math>m</li> </ul> |
| <b>T&amp;E regimen (BCVA and OCT examined at every clinic visit)</b>                                                                                                                                                               |                                                                                                                                                                                                                                                                                                |
| <b>Shorten</b> (- 4 weeks)<br>Minimum interval: 4 weeks                                                                                                                                                                            | <b>Extend</b> (+ 4 weeks)<br>Maximum interval: 24 weeks                                                                                                                                                                                                                                        |
| <ul style="list-style-type: none"> <li>● BCVA loss <math>\geq</math> 5 ETDRS letters</li> <li>OR</li> <li>● New or increased SRF and/or IRC</li> <li>OR</li> <li>● CFT increase <math>\geq</math> 100 <math>\mu</math>m</li> </ul> | <ul style="list-style-type: none"> <li>● BCVA loss <math>&lt;</math> 5 ETDRS letters</li> <li>AND</li> <li>● No SRF and IRC, or stable IRC over 2 consecutive treatment visits after the loading phase</li> <li>AND</li> <li>● CFT increase <math>&lt;</math> 100 <math>\mu</math>m</li> </ul> |

BCVA, best-corrected visual acuity; CFT, central foveal thickness; ETDRS, Early Treatment Diabetic Retinopathy Study; IRC, intraretinal cyst; OCT, optical coherence tomography; PRN, pro re nata; SRF, subretinal fluid; T&E, treat-and-extend.
